# 1 Self-rated smell ability enables highly specific predictors of 2 COVID-19 status: a case control study in Israel

3 Noam Karni<sup>1#</sup>, Hadar Klein<sup>2#</sup>, Kim Asseo<sup>2</sup>, Yuval Benjamini<sup>3</sup>, Sarah Israel<sup>1</sup>, Musa Nimri<sup>1</sup>,  
4 Keren Olstein<sup>4</sup>, Ran Nir-Paz<sup>4</sup>, Alon Hershko<sup>1</sup>, Mordechai Muszkat<sup>1\*</sup>, Masha Y. Niv<sup>2\*</sup>

5 #equal contributions

6 \*co-corresponding authors

7 <sup>1</sup>Department of Medicine, Hadassah University Hospital, Mt. Scopus Campus, Jerusalem, Israel

8 <sup>2</sup>The Institute of Biochemistry, Food and Nutrition, The Hebrew University, Rehovot, Israel

9 <sup>3</sup>Department of Statistics, The Hebrew University, Mt. Scopus Campus, Jerusalem, Israel

10 <sup>4</sup>Department of Clinical Microbiology and Infectious Diseases Hadassah-Hebrew University medical  
11 center

12

13 CORRESPONDING AUTHORS:

14 Prof, Masha Y Niv, PhD

15 Chemical Senses and Molecular Recognition Lab

16 Robert H. Smith Faculty of Agriculture, Food and Environment, Rehovot, Israel

17 The Hebrew University of Jerusalem, Israel

18 E-mail: [masha.niv@mail.huji.ac.il](mailto:masha.niv@mail.huji.ac.il) Tel: +972-89489664

19

20 Prof. Mordechai Muszkat, MD

21 Head, Department of Internal Medicine Hadassah University Hospital, Mt. Scopus

22 Jerusalem, Israel

23 E-mail: [muszkatm@hadassah.org.il](mailto:muszkatm@hadassah.org.il), Tel. 972-50-8573793

24

25 NOTE: This preprint reports new research that has not been certified by peer review and should not be used to guide clinical practice.

## 26 **ABSTRACT**

27 **Background:** Clinical diagnosis of COVID-19 poses an enormous challenge to early  
28 detection and prevention of COVID-19, which is of crucial importance for pandemic  
29 containment. Cases of COVID-19 may be hard to distinguish clinically from other acute  
30 viral diseases, resulting in an overwhelming load of laboratory screening. Sudden  
31 onset of taste and smell loss emerge as hallmark of COVID-19. The optimal ways for  
32 including these symptoms in the screening of suspected COVID-19 patients should  
33 now be established.

34 **Methods:** We performed a case-control study on patients that were PCR-tested for  
35 COVID-19 (112 positive and 112 negative participants), recruited during the first wave  
36 (March 2020 – May 2020) of COVID-19 pandemic in Israel. Patients were interviewed  
37 by phone regarding their symptoms and medical history and were asked to rate their  
38 olfactory and gustatory ability before and during their illness on a 1-10 scale.  
39 Prevalence and degrees of symptoms were calculated, and odds ratios were  
40 estimated. Symptoms-based logistic-regression classifiers were constructed and  
41 evaluated on a hold-out set.

42 **Results:** Changes in smell and taste occurred in 68% (95% CI 60%-76%) and 72% (64%-  
43 80%), of positive patients, with 24 (11-53 range) and 12 (6-23) respective odds ratios.  
44 The ability to smell was decreased by  $0.5 \pm 1.5$  in negatives, and by  $4.5 \pm 3.6$  in  
45 positives, and to taste by  $0.4 \pm 1.5$  and  $4.9 \pm 3.8$ , respectively (mean  $\pm$  SD). A penalized  
46 logistic regression classifier based on 5 symptoms (degree of smell change, muscle  
47 ache, lack of appetite, fever, and a negatively contributing sore throat), has 66%  
48 sensitivity, 97% specificity and an area under the ROC curve of 0.83 (AUC) on a hold-  
49 out set. A classifier based on degree of smell change only is almost as good, with 66%

50 sensitivity, 97% specificity and 0.81 AUC. Under the assumption of 8% positives among  
51 those tested, the predictive positive value (PPV) of this classifier is 0.68 and negative  
52 predictive value (NPV) is 0.97.

53 **Conclusions:** Self-reported quantitative olfactory changes, either alone or combined  
54 with other symptoms, provide a specific and powerful tool for clinical diagnosis of  
55 COVID-19. The applicability of this tool for prioritizing COVID-19 laboratory testing is  
56 facilitated by a simple calculator presented here.

57

## 58 **KEYWORDS**

59 COVID-19, smell loss, taste loss, symptoms, diagnosis, prediction, olfactory  
60 dysfunction, gustatory dysfunction, classifier, screening, rating

## 61 **BACKGROUND**

62 In December 2019, the severe acute respiratory syndrome coronavirus 2 (SARS-CoV-  
63 2) was reported in Wuhan, China[1]. The resulting coronavirus disease COVID-19 has  
64 become a global pandemic with 16.5 million reported cases as of July 29th, 2020  
65 (World Health Organization, 2020). When assessing SARS-CoV-2 infection, clinicians  
66 initially focused on the most common symptoms at the onset of COVID-19 illness such  
67 as fever, cough, and fatigue. Other reported signs and symptoms included sputum  
68 production, headache, hemoptysis, diarrhea, and dyspnea [2].

69 Since March 2020, an increasing number of reports regarding taste and smell loss in  
70 COVID-19 infections appeared in preprints[3, 4] and in general press, and it is currently  
71 well established that taste and smell loss is common in COVID-19 patients[5–8].

72 Earlier studies have already suggested associations between anosmia (loss of smell)  
73 and the coronavirus causing Severe Acute Respiratory Syndrome (SARS), SARS-CoV-1.  
74 Olfactory symptoms[9] and taste disorders[10] have also been associated also with  
75 viral upper respiratory tract infections caused by other viruses, as well. However, the  
76 prevalence of olfactory loss in COVID-19 is usually reported as much higher[11–15]  
77 than in other diseases[16]. In a recent crowd-sourced study, ~7000 app users reported  
78 testing positive for COVID-19, with 65% of those reporting that they lost their sense  
79 of smell or taste[14], a three-fold increase in prevalence compared to COVID-19  
80 negatives[17]. The severity of smell and taste loss in COVID-19 patients is striking:  
81 these sensory abilities were reduced by  $-79.7 \pm 28.7$ ,  $-69.0 \pm 32.6$  (mean  $\pm$  SD),  
82 respectively, as reported by about 4000 participants using a 0-100 visual analog scale  
83 (VAS)[7]. A follow-up study found that recent smell loss is the best predictor for COVID-  
84 19[18].

85 Here we assess the prevalence of different COVID-19 symptoms as well as the degree  
86 and additional characteristics of smell and taste changes in PCR-swab tested COVID-  
87 19 positive vs COVID-19 negative patients. Importantly, patients were recruited in a  
88 manner that did not disclose the underlying chemosensory questions in this study. We  
89 used these data to develop a classifier that can prioritize patients for PCR-testing, help  
90 epidemiological investigations, and screen large populations.

91

## 92 **METHODS**

### 93 **Aim and setting**

94 This prospective study compared symptoms in real time (RT) polymerase chain  
95 reaction (PCR)-tested COVID-19 positive and COVID-19 negative patients. Patients  
96 having PCR-test results (positive or negative) were recruited via social media (Twitter  
97 and Facebook) and word of mouth from March 2020 to May 2020 and interviewed  
98 from April 2020 to June 2020. The cohort comprised 224 Israeli patients aged  $\geq 18$   
99 years (Figure 1) Israeli patients. The participants were not aware that the  
100 questionnaire will include smell and taste loss symptoms prior to their agreement to  
101 partake in the study. Informed consent was obtained from all participants. The study  
102 was approved by the Hadassah Medical Center Helsinki Committee (permit number  
103 0236-20-HMO).

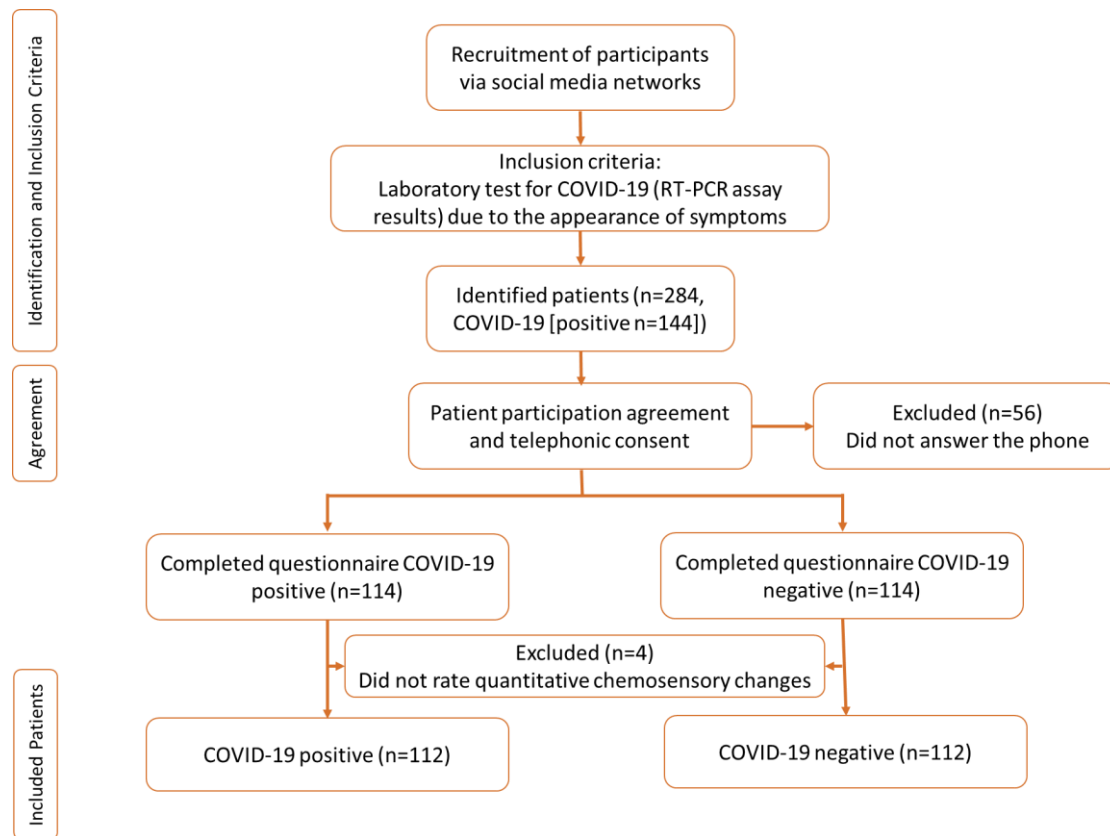

104

105 **Figure 1. Flow chart of patients' selection for case control study.**

106

### 107 **General design**

108 The interviews were carried out over the phone. The questionnaire is based on  
109 questions compiled by physicians and scientists in the Global Consortium for  
110 Chemosensory Research, GCCR[7]. The full questionnaire is included in  
111 Supplementary data and has five parts: 1) General information (e.g., age, gender); 2)  
112 Medical history (e.g., medical conditions, medications, changes in taste/smell in the  
113 past, pregnancy, contact with a confirmed patient); 3) Current illness: 23 physical signs  
114 and symptoms, including binary question (yes/no) on smell, taste and chemesthesis  
115 (cooling, burning, tingling sensation), PCR swab test results and dates, date of  
116 exposure to confirmed COVID-19 patient, subjective recovery feeling; 4) Smell:  
117 Participants were instructed to rate their sense of smell/ taste and the degree of their

118 nose blockage on a scale from 1-10 (1 corresponding to “no sense of smell” and 10 to  
119 excellent sense of smell) and similarly rate the ability to breathe through the nose  
120 before/during/after illness. Blocked nose rating was used to test the plausible  
121 hypothesis that it causes a change of smell; 5) Taste (e.g., rating of taste ability  
122 before/during/after illness, as described for smell), experience of strange/bad taste in  
123 the mouth, change in sensitivity to irritants (chemesthesis) and change in basic taste  
124 modalities – sweet, salty, sour, bitter, each elicited by non-volatile compounds via  
125 specific receptors or channels expressed in dedicated taste receptor cells [19]. The  
126 fifth basic taste modality, umami or savory, was not used because it does not have a  
127 Hebrew translation. “Other” taste was available as an additional optional answer. Data  
128 was kept in Compusense Cloud on-line software (Compusense Inc., Guelph, ON,  
129 Canada).

130

### 131 **Statistical analysis**

132 Log-odds for the individual symptoms were calculated over the full dataset.  
133 Confidence intervals and p-values for the log-odds were estimated from the *glm*  
134 function using the logistic link implemented in the statistical software R  
135 (<https://www.r-project.org/>).

136 Classifiers were trained from the reported symptoms to evaluate the  
137 separation between COVID-19 positive and COVID-19 negative patients. The classifiers  
138 were trained on a random subset of 2/3 of the data (the training set, 148 samples),  
139 and evaluated on the remaining samples (the test set). Sampling of the train and test  
140 sets was stratified by COVID-19 status. We trained the classifier on the full symptom  
141 matrix: All symptoms of question 23 in the questionnaire (see Supplementary) were

142 included, except "no symptoms" or "other". All eye symptoms were combined to "Eye  
143 symptoms". Also added were quantitative questions for taste, smell, and nose  
144 blockage (rating before the illness minus rating during the illness, questions 31, 35, 37,  
145 38, 40, 41 in the questionnaire) and chemesthesis (question 45) "Coated tongue",  
146 "Dizziness", "Ears pressure", "Eye burn", "Eye discharge", "Hearing change",  
147 "Lacrimation", and "Vision changes" were removed since these symptoms were  
148 reported by less than 10% of the subjects. The classifiers were trained as penalized  
149 logistic regressions, using the elastic net algorithm ( $\alpha = 0.5$  implemented in the *glmnet*  
150 package in the R environment. This regression method encourages sparse coefficient  
151 vectors, meaning that it is suitable in situations where only few coefficients are non-  
152 zero. The regularization parameter ( $\lambda$ ) was initially set using cross-validation,  
153 but then increased until the model included no more than six symptoms. For classifiers  
154 based on a single symptom, no regularization was used.

155         Classifiers were evaluated using the hold-out test set. The score from the  
156 classifier was thresholded at zero, so that patients with score exceeding 0 were called  
157 positive by the classifier. Sensitivity (predicting COVID-19 positives correctly) and  
158 specificity (predicting COVID-19 negatives correctly) metrics were calculated from the  
159 following formulas:

$$160 \quad \text{Sensitivity} = \frac{TP}{TP + FN}, \quad \text{Specificity} = \frac{TN}{TN + FP}$$

161 in which TP (TN) are the COVID-19 positives (negatives) classified correctly, and FN  
162 (FP) are the COVID-19 positives (negatives) classified incorrectly. Due to our balanced  
163 sample, accuracy is the average of sensitivity and specificity. We further computed the  
164 accuracy metrics that account for the expected proportion of positive cases in the  
165 tested population, namely the positive predictive value (PPV) and the negative



166 predictive value (NPV). The scores obtained from the logistic classifier ( $s$ ) were  
167 translated into probability to be positive ( $P$ ) by adjusting for the proportion of COVID+  
168 out of the tests ( $\pi$ ) according to the following formulas:

$$169 \quad o = \frac{P(+|Symptoms)}{P(-|Symptoms)} = \exp(s) * \frac{\pi}{1 - \pi}$$

$$170 \quad P = \text{Probability to be positive} = \frac{o}{o + 1}$$

171 We take  $\pi$  to be 0.08 because that was the proportion during data collection.

172 The ROC curve corresponds to true-positive and false-positive rates for different  
173 values of the threshold; the curve and the area under the ROC curve (AUC), which  
174 measures the degree of separability between positive and negative scores, were  
175 estimated using the *pROC* package[20].

176

### 177 **Sample size calculation**

178 The sample size was calculated to allow detecting differences in smell-loss or taste-  
179 loss prevalence between COVID-19 positive and negative populations. Based on  
180 previous research [e.g. [21]], we used conservative estimates of 60% prevalence in the  
181 positive population and 35% prevalence in the negative population. Power was  
182 estimated by Monte Carlo simulations, namely repeatedly ( $b=1000$ ) resampling from  
183 two Binomial distributions corresponding to the positive population and the negative  
184 population. Assuming 100 individuals are assigned to each group, and a two-sided t-  
185 test is used, the probability of detection (power) is 92%. To be on the conservative  
186 side, we used somewhat larger samples.

187

## 188 **RESULTS:**

### 189 **Patients' characteristics**

190 Completed questionnaires were obtained from 112 COVID-19 positives and 112  
191 COVID-19 negatives. The median age of the respondents was  $35 \pm 12$  years for

192 positives and  $37 \pm 12$  years for negatives (mean  $\pm$  SD) years. The positives group  
193 included more men (64%), while the negatives group was more balanced (48% males).  
194 Seven patients classified as hospitalized (received respiratory support during their  
195 hospitalization and / or were hospitalized in the intensive care unit) and the rest 217  
196 were classified as ambulatory patients.

197

## 198 Patients' symptoms

199 Signs and symptoms that appeared in the binary part of the questionnaire  
200 (Supplementary Material, question 23 of the full questionnaire) and were found to  
201 occur in at least 10% of the positive patients are summarized in Table 1. A few  
202 symptoms, including dry cough and sore throat, were prevalent in COVID-19 positives,  
203 but even more so in the negatives control sample.

204 Smell change, taste change, change in chemesthetic ability (perceiving spicy, tingling  
205 or cooling sensations) and muscle ache were significantly more prevalent in COVID-19  
206 positive as compared to COVID-19 negative patients (68%, 72%, 31%, 62% vs. 8.0%,  
207 18%, 6%, 34%, respectively) (Table 1). Other CDC recognized symptoms[22], such as  
208 lack of appetite, fever, and diarrhea were approximately twice or three times more  
209 common among positives than negatives.

210

211 **Table 1. Prevalence and odds ratios of signs and symptoms.** Only signs and symptoms  
212 that were present in at least 10% of all study participants are listed. Those with the  
213 highest odds ratios are shown in red and those reported by at least a third of positives  
214 are shown in boldface.

|                         | Positives (%) | Negatives (%) | P-value           | Estimated OR (Lower bound, Upper bound) |
|-------------------------|---------------|---------------|-------------------|-----------------------------------------|
| <b>Smell change</b>     | <b>68</b>     | <b>8</b>      | <b>&lt;0.0001</b> | <b>24.16 (10.98, 53.14)</b>             |
| <b>Taste change</b>     | <b>72</b>     | <b>18</b>     | <b>&lt;0.0001</b> | <b>12.02 (6.36, 22.72)</b>              |
| <b>Chemesthesis</b>     | <b>31</b>     | <b>6</b>      | <b>&lt;0.0001</b> | <b>6.82 (2.88, 16.16)</b>               |
| <b>Muscle ache</b>      | <b>62</b>     | <b>34</b>     | <b>&lt;0.0001</b> | <b>3.25 (1.88, 5.61)</b>                |
| <b>Lack of appetite</b> | <b>53</b>     | <b>27</b>     | <b>&lt;0.0001</b> | <b>3.04 (1.74, 5.32)</b>                |
| <b>Fever</b>            | <b>65</b>     | <b>41</b>     | <b>&lt;0.0001</b> | <b>2.69 (1.56, 4.61)</b>                |
| Diarrhea                | 24            | 12            | 0.01              | 2.42 (1.17, 4.98)                       |
| Abdominal pain          | 21            | 11            | 0.03              | 2.27 (1.07, 4.81)                       |
| Nausea or vomiting      | 21            | 12            | 0.07              | 1.97 (0.94, 4.12)                       |
| Eye symptoms            | 21            | 12            | 0.1               | 1.81 (0.88, 3.73)                       |

|                         |           |           |                   |                          |
|-------------------------|-----------|-----------|-------------------|--------------------------|
| <b>Headache</b>         | <b>62</b> | <b>49</b> | <b>0.06</b>       | <b>1.66 (0.98, 2.83)</b> |
| <b>Productive cough</b> | <b>46</b> | <b>40</b> | <b>0.4</b>        | <b>1.24 (0.73, 2.12)</b> |
| Bad taste in mouth      | 17        | 14        | 0.6               | 1.23 (0.59, 2.53)        |
| <b>Runny nose</b>       | <b>38</b> | <b>39</b> | <b>0.9</b>        | <b>0.96 (0.56, 1.65)</b> |
| Fatigue                 | 18        | 21        | 0.6               | 0.84 (0.43, 1.64)        |
| Chest pain              | 23        | 28        | 0.5               | 0.79 (0.43, 1.44)        |
| Voice change            | 13        | 18        | 0.4               | 0.71 (0.34, 1.47)        |
| <b>Dry cough</b>        | <b>62</b> | <b>71</b> | <b>0.2</b>        | <b>0.67 (0.38, 1.17)</b> |
| <b>Sore throat</b>      | <b>37</b> | <b>56</b> | <b>&lt;0.0001</b> | <b>0.45 (0.26, 0.77)</b> |
| Breath difficulty       | 21        | 38        | <0.0001           | 0.43 (0.24, 0.78)        |

215 \* burning, cooling or tingling sensation

216

217 Nausea or vomiting, although considered a COVID-19 symptom, were not more  
 218 common among COVID-19 positive as compared to COVID-19 negative patients. By  
 219 contrast, lack of appetite, despite not being included as an "official" CDC  
 220 symptom[22], was found to be significantly more common in COVID-19 positive  
 221 patients.

222 Taste and smell change often, but not always, together: Figure 2A shows the  
 223 distribution of reports on taste and smell changes. Change in both smell and taste  
 224 perception was reported by 63% of positive patients and only 6% of negative patients.  
 225 4% of positive patients experienced only smell change and 9% reported taste change  
 226 with no smell change.

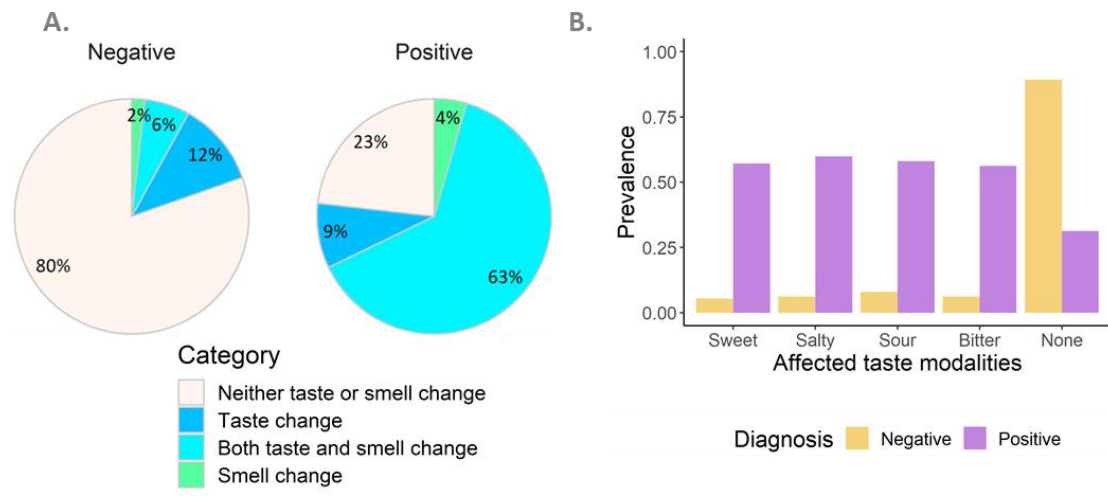

227

228 **Figure 2. Smell, taste, and taste modalities changes during disease.** A. The pie chart presents  
229 prevalence of smell and taste changes in positive and negative patients, occurring together or  
230 separately. Numbers indicate percentage of COVID-19 positives and negatives reporting taste  
231 or smell loss (blue and green respectively), both taste and smell loss (turquoise) or neither  
232 (seashell). B. The prevalence of the four taste modalities in COVID-19 positive and  
233 negative patients. COVID-19 positives are represented in purple and COVID-19  
234 negatives are represented in orange

235

236 Approximately 60% of the positive patients reported impairment of at least one of the  
237 four taste modalities (sweet, salty, sour, and bitter) compared to only ~6% among the  
238 negative patients (Figure 2B). In COVID-19 positive patients with taste impairment, all  
239 four taste modalities were usually impaired. In 31% of the positive patients and in 90%  
240 of the negative ones, no taste modality was impaired.

241

## 242 **Chemosensory changes rating and details**

243 In addition to the binary questions, the participants were asked to rate their smell and  
244 taste senses before and during their illness on a 1-10 scale.

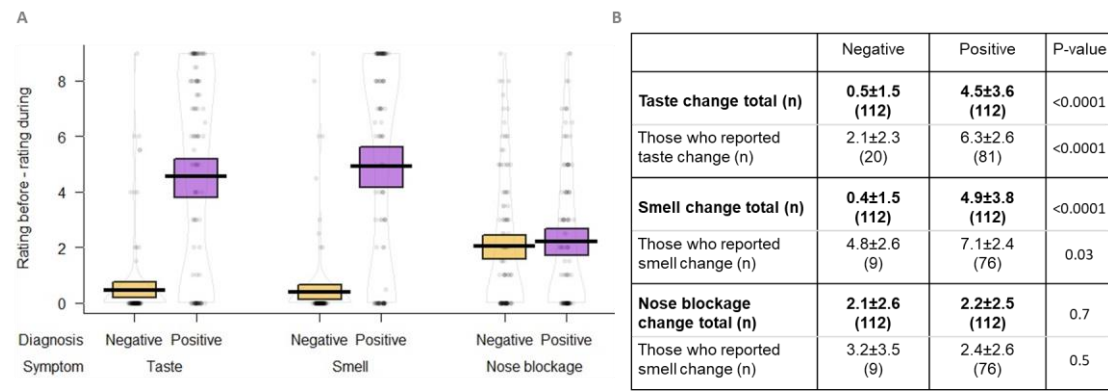

245

246 **Figure 3. Degree of taste, smell and nose blockage in COVID-19 positives and negatives. A.**

247 Histogram showing the change in rating during the illness minus rating before the illness for

248 taste, smell, and nose blockage. No change is coded 0 and the highest change is 9. COVID-19

249 positives are represented in purple and COVID-19 negatives are represented in orange. **B.**

250 Table of mean ± SD for COVID-19 positives and negatives in general and for those reporting

251 changes of taste or smell. Scores for taste, smell, and nose blockage were evaluated on a 1-10

252 scale. P values for the difference in the magnitude of change between COVID-19 positives and

253 negatives was calculated using a two-sided t-test.

254

255 As is seen in Figure 3, the change in smell and taste ability during disease, compared

256 to a self-reported individual baseline before the disease, differs greatly between

257 positive and negative patients. Both taste and smell changes were significantly greater

258 for COVID-19 positive patients compared to COVID-19 negative patients (4.5±3.6 and

259 4.9±3.8 vs. 0.5±1.5 and 0.4±1.5, mean ± SD, p<0.0001 and p<0.0001, respectively).

260 When considering only patients who reported taste or smell changes (answered “yes”

261 to the respective binary questions), the averages in positive patients were 6.3±2.6 for

262 taste and 7.1±2.4 for smell, compared to negative patients with 2.1±2.3 for taste and

263 4.8±2.6 for smell (among patients with any change in taste p<0.0001, in smell

264 p<0.0001).

265 We next set out to check which combination of symptoms will be most useful for  
 266 differentiating between COVID-19 positive and COVID-19 negative diagnosis. To that  
 267 end, several classifiers were trained based on 66% of the sample and evaluated on  
 268 34% that was kept as a holdout set. The process of selection of descriptors is outlined  
 269 in Figure 4. Relevant symptoms (n=30) were included as possible descriptors for the  
 270 classifiers, and the elastic-net penalization was increased until no more than six  
 271 symptoms were included in the model (number limited for practicality). The effect of  
 272 excluding or including a particular symptom was evaluated in order to understand the  
 273 importance of separating taste from smell and using binary vs. quantitative measures  
 274 for each (Figure 4).

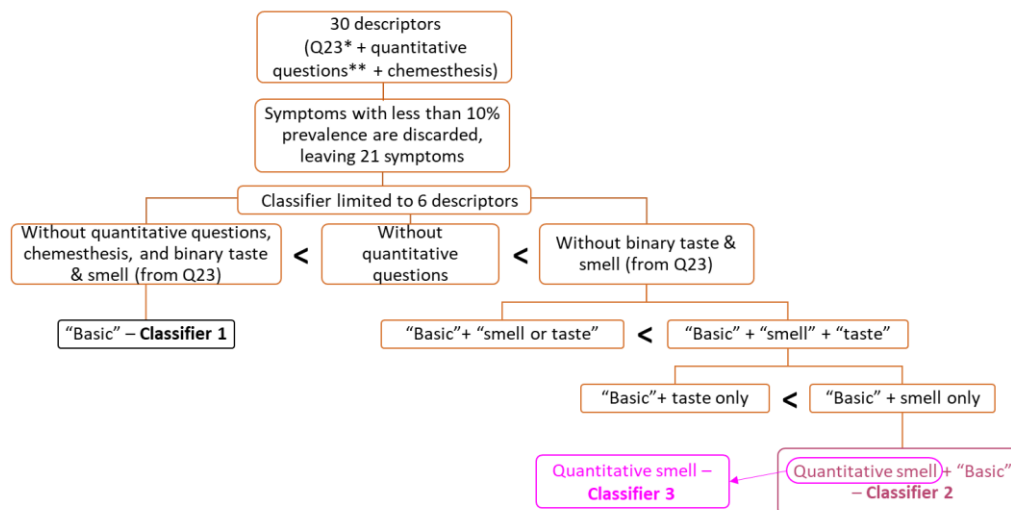

\*includes all symptoms in question 23 excluding "no symptoms", coding "other" to "fatigue" and "dizziness", and grouping eye symptoms  
 \*\*includes taste, smell and nose blockage.

275

276 **Figure 4. Descriptors selection process for classifiers.** The flow chart depicts total symptoms  
 277 selected for the classifiers. Upon limiting the number of descriptors for the classifiers and  
 278 excluding chemosensory symptoms as described, Classifier 1 was created. Different  
 279 combinations of symptoms established better classifiers than Classifier 1, those using  
 280 quantitative questions exhibiting better performance than those using binary ones. The

281 classifier using "smell" and "taste" as separate descriptors, rather than "smell or taste" as a  
282 single joint descriptor showed better performance. The "Basic" + smell only descriptor  
283 outperformed the "Basic" + taste only descriptor, resulting in Classifier 2. Finally, the smell  
284 only descriptor was tested alone without all other "Basic" symptoms, resulting in Classifier 3.

285

286 The results of the evaluation on the holdout set are summarized in Supplementary  
287 Table 1, and classifiers 1-3 can be seen in Figure 5. Classifiers that did not use  
288 chemosensory symptoms had poor performance (AUC 0.60, black curve, classifier 1,  
289 and additional classifiers (Table S1). Adding the quantitative smell-change symptom  
290 (maroon curve, Classifier 1) is sufficient to outperform all other classifiers (AUC 0.83).  
291 Remarkably, using quantitative smell-change as a sole symptom (magenta curve,  
292 Classifier 3) resulted in a classifier that was nearly equally effective as Classifier 2 (AUC  
293 0.81).

294 Adding taste change to Classifier 2 did not improve its performance, as it resulted in  
295 AUC of 0.82 (Classifier 7, Table S1). Furthermore, taste change as a sole descriptor  
296 resulted in AUC of 0.75 (Classifier 15, Table S1) and as an added descriptor to other  
297 "Basic" symptoms, it resulted in AUC of 0.76 (Classifier 13, Table S1). Thus, while there  
298 is a high correlation (0.82) between quantitative changes in smell and quantitative  
299 changes in taste, in our sample the smell change descriptor outperforms the taste  
300 descriptor. Using the quantitative smell and taste descriptors resulted in higher AUC's  
301 than binary (yes/no) descriptors of these changes. For example, a binary smell  
302 descriptor used as a sole descriptor resulted in AUC of 0.78 (Classifier 16, Table S1), as  
303 compared to AUC of 0.81 using quantitative smell descriptor.

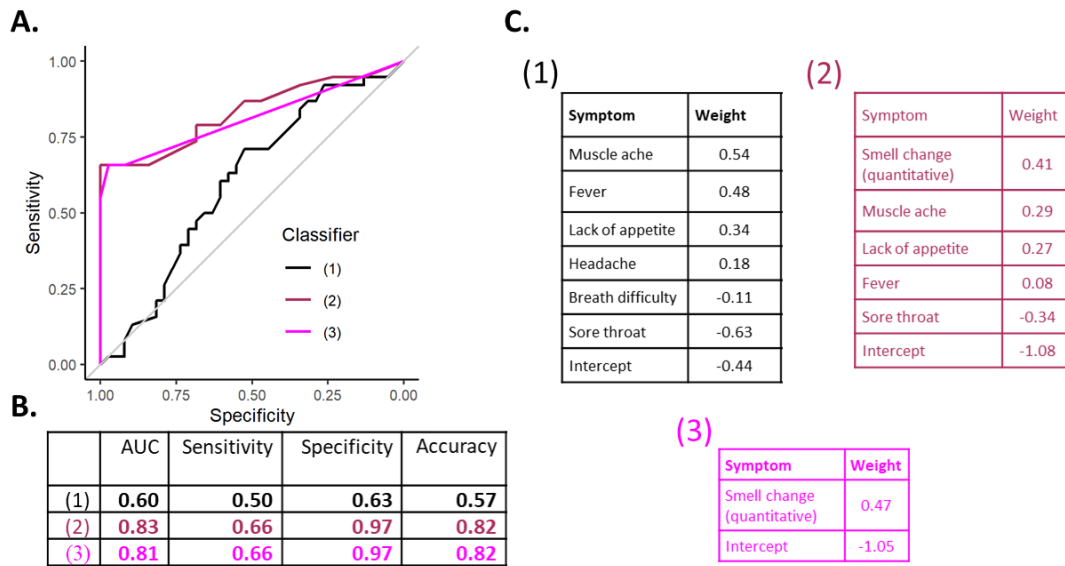

304

305

306 **Figure 5. A.** ROC curves for the classifiers considered. **B.** Statistical parameters for the ROC  
 307 curves. For the quantitative descriptors, the coefficients correspond to a descriptor scaled to  
 308 the 0-1 range. **C.** Descriptors, their coefficients and intercept (fitted parameter) used in  
 309 Classifiers 1, 2 and 3.

310

311 Scores according to the classifiers can be readily transformed into the probability for  
 312 COVID-19, under additional factor: the known rate of positive tests. The rate of  
 313 positive tests out of total PCR tests at the time of participants recruitment was  
 314 calculated to be 8% based on data from Israeli Ministry of Health. By incorporating this  
 315 factor (as described in the Methods), we were able to reach PPV of 0.68 and NPV of  
 316 0.97 for both classifiers. A probability calculator based on Classifiers 2, 3 and 13 (from  
 317 Supplementary) is available in GITHUB  
 318 ([https://github.com/KimAsseo/Hadassah\\_COVID-19](https://github.com/KimAsseo/Hadassah_COVID-19)) and may be used for practical  
 319 purposes in clinical life.

320



## 321 **DISCUSSION**

322 We have established the prevalence and degree of decrease in taste and smell in  
323 patients who were eligible to receive PCR swab tests during the COVID-19 pandemic  
324 and found significant differences in PCR-positive and PCR-negative patients.

325 The change in smell ability is not related to nasal obstruction, as nose blockage was  
326 low, in accord with previous studies[7, 23]. Taste and chemesthesis changes strongly  
327 correlate with smell change (also shown and discussed by Parma[7]). Taste changes  
328 are more common in negatives, and chemesthesis are less common in positives,  
329 leading to odds ratios for these chemosensory modalities that are high, but lower than  
330 for olfaction. Accordingly, taste and chemesthesis were not captured by the  
331 classification analysis as characteristics contributing to improvement of the classifier.

332 All taste modalities in COVID-19 patients were impacted together (or not at all). This  
333 is of interest for understanding the pathophysiology of the disease: a recent study  
334 suggests CoV-2 infection of non-neuronal cell types expressing ACE2 and TMPRSS2 as  
335 the mechanism underlying COVID-19 related anosmia[24], but the reason for COVID-  
336 19 ageusia is less clear [19, 25]. Our results support the idea of impairment of  
337 supporting cells or tissues, rather than of taste receptors cells Type 2, which express  
338 bitter, sweet and umami taste receptors or Type 3 which express sour sensing  
339 channels [26]. However, our observation that individual taste modalities and general  
340 taste ability are greatly impaired in COVID-19 patients did not warrant addition of  
341 taste questions for patients screening, as these did not contribute to the classifier  
342 performance. Nevertheless, patients with prior conditions of impaired olfaction  
343 (estimated 5% of population[27]) require a suited classifier.

344 We thus present three versions of classifiers: the first one is based on four yes/no  
345 questions (muscle ache, lack of appetite, fever, sore throat) and the quantitative smell  
346 change calculated from self-rating of smell perception before and during the current  
347 illness. The second version uses only the quantitative smell change and has a similar  
348 AUC. The third one (suited for participants with pre-existing olfactory impairment) is  
349 based on five yes/no questions (muscle ache, lack of appetite, fever, sore throat,  
350 breath difficulty) and quantitative taste change. The probabilities for COVID-19 based  
351 on these calculators are available via Github.

352 Our study confirms previous reports [21, 28] showing an association between changes  
353 in smell and taste with the positive status of COVID-19. Our best-performing classifier  
354 (Classifier 2, AUC 0.83) used symptoms found to be predictive also by Menni *et al.*[14].  
355 Specifically, these authors reported chemosensory loss and loss of appetite as  
356 positively contributing. However, their chemosensory descriptor is "loss of smell and  
357 taste", while ours involves quantitative smell change.

358 Our study was performed in parallel to Gerkin *et al.*[18], and similarly included both  
359 binary and quantitative questions regarding taste and smell as two separate  
360 indicators. Our results for positive patients are in overall agreement with Parma *et al.*  
361 *et al.*[7] and Gerkin *et al.*[18]. This is striking in view of the different methods employed  
362 for recruitment (targeting smell and change impairment worldwide vs PCR-positive  
363 COVID-19 patients in Israel), data collection (online survey vs telephone interviews),  
364 and quantitative scales (100-point visual analogue scales (VAS) vs. 1-10 scale in this  
365 0/82study). In essence, both Gerkin *et al.* and the current study suggest that  
366 quantitative smell change is the best predictor of COVID-19 in single and in cumulative  
367 feature models and is better than binary feature. The superior performance of the

368 classifier (AUC of 0.83 vs. 0.72 in [18]) is probably due to a more realistic  
369 representation of our sample, in which chemosensory losses were not over-  
370 represented.

371 With the increasing public awareness to smell impairment as COVID-19 characteristic  
372 symptoms, individuals presenting smell and taste change are now more likely to be  
373 suspected of having COVID-19. By considering other symptoms and the severity of  
374 chemosensory change, our calculators provide a free, fast and easy to use tool that  
375 can provide immediate answers for patients awaiting their PCR-swab test results and  
376 potentially decrease anxiety of negative patients who experienced smell and taste  
377 impairments.

378

### 379 **Study limitations**

380 The method of patient recruitment is one of the limitations of this study: social media-  
381 based recruitment may limit participants' representation as it targets mostly younger  
382 patients, with internet access and social media accounts. Word of mouth recruitment  
383 was used as well and contributes as well to creating a sample that is not necessarily  
384 representative of the general population. Male and female patients were not fully  
385 matched across positives (64% males) and negatives (48% males), in accord with  
386 higher % of males (56%) among COVID-19 patients in Israel.

387 Importantly, symptoms-based classifiers cannot capture asymptomatic COVID-19  
388 patients. Therefore, low probability established with our classifiers should not be  
389 considered as a predictor of negative COVID-19 status. In other words, our classifiers  
390 are not SNOOUT ('Sensitive test when Negative rules OUT the disease') but can  
391 definitely be referred to as 'Specific test when Positive rules IN the disease' (SPIN).

392 While chemosensory loss is a dominant feature of symptomatic COVID-19 patients,  
393 about 30% of them do not report such loss. Our sample was not large enough to  
394 include many positive patients in this subgroup, and further studies are needed to  
395 capture distinctive characteristics of COVID-19 patients with intact smell and taste.

396 Additionally, our sample was composed of light to moderately ill patients, thus the  
397 classifiers reported are not necessarily applicable to patients with severe forms of  
398 COVID-19. It should also be kept in mind that our data is specific to Israeli patients and  
399 reflect to some degree the criteria for PCR tests eligibility during the recruitment  
400 (fever and dry cough were sufficient for PCR test but change of smell and/or taste  
401 alone was not).

402 Another possible limitation of this study is the self-reporting, rather than objective  
403 testing method for data collection used. Clearly, the infectious nature of the disease  
404 cause data collection to be mostly based on self-reports[29], but classifiers based on  
405 brief objective examination of taste and smell symptoms may provide additional  
406 insights.

407 Lastly, RT-PCR is a commonly used diagnostic test for COVID-19 and for that reason it  
408 was used in the present study as a distinguishing criterion. Nevertheless, even this test  
409 may report false diagnosis (26%-37%)[30, 31]. Considering the inaccuracy of PCR tests,  
410 high scores from our classifiers may help to reinforce true positive results and possibly  
411 capture PCR false negative patients.

412

## 413 **CONCLUSIONS**

414 The resurging pandemic puts the clinic and public health authorities in a scenario not  
415 usual for modern medicine – namely, the limited resources require or may require in

416 the future, prioritization of testing and treatment. The fact that our sample contained  
417 PCR-positive and PCR-negative ambulatory patients, all suspected to have COVID-19  
418 prior to PCR testing, enabled the development of symptoms-based classifiers.

419 Our results suggest that ranking of the ability to smell before and during the illness, is  
420 an excellent practical approach to identify COVID-19 positive patients offering  
421 reasonably high predictive capability (Specificity 97%, Accuracy 82%). Additional  
422 classifier is available for patients with prior olfactory impairments (Supplementary  
423 Material Table S2).

424 Based on the classifiers developed in this work, we propose a simple calculator that  
425 can be used to prioritize testing (available at  
426 [https://github.com/KimAsseo/Hadassah COVID-19](https://github.com/KimAsseo/Hadassah_COVID-19)). Additionally, high-performance  
427 classifier may potentially capture false negative PCR tests results of high scored  
428 individuals. Detection and isolation of potential COVID-19 patients is of crucial  
429 importance for pandemic containment but remains a persistent challenge worldwide  
430 due to lacking accessibility to tests. While further research is required, the current  
431 study provides a practical tool for assessing potential COVID-19 patients.

432

### 433 **LIST OF ABBREVIATIONS**

434 CDC - Centers for Disease Control and Prevention

435 SARS-CoV-2 - Severe Acute Respiratory Syndrome Coronavirus 2

436 SARS - Severe Acute Respiratory Syndrome

437 VAS - Visual Analog Scale

438 SD - Standard Deviation

439 GCCR - Global Consortium for Chemosensory Research

440 AUC - Area Under the Curve

441 PPV – Positive Predictive Value

442 NPV – Negative Predictive Value

443 RT - Real Time

444 PCR - Polymerase Chain Reaction

445 SNOUT - Sensitive test when Negative rules OUT the disease

446 SPIN - Specific test when Positive rules IN the disease

447 ROC curve - Receiver Operating Characteristic curve

448

#### 449 **CONFLICT OF INTEREST**

450 The authors declare that they have no competing interests.

451

#### 452 **AUTHORSHIP CONTRIBUTION**

453 NK and MYN initiated the research, NK and MN recruited patients, NK, MYN, YB

454 and MM and designed the research, SI, MM, RNP and MYN supervised the research,

455 HK carried out the interviews, HK and MYN drafted the manuscript, KA and YB

456 preformed the statistical analysis and created figures and tables. All authors contributed

457 to writing and approved the final manuscript.

458

#### 459 **ACKNOWLEDGEMENTS**

460 MYN is supported by Masha Niv is supported by Israel Science Foundation grant

461 #1129/19. HK is a recipient of the Uri Zehavi Scholarship.

462

#### 463 **Ethics approval and consent to participate**

464 The study was conducted in accordance with Helsinki committee and the required ethics

465 approval was granted (reference number HMO-0236-20).

466

467 **Consent for publication**

468 Written informed consents for publication of patients' clinical details were obtained  
469 from the patients.

470

471 **BIBLIOGRAPHY**

472 1. Zhu N, Zhang D, Wang W, Li X, Yang B, Song J, et al. A novel coronavirus from  
473 patients with pneumonia in China, 2019. *N Engl J Med*. 2020;382:727–33.

474 doi:10.1056/NEJMoa2001017.

475 2. Rothan HA, Byrareddy SN. The epidemiology and pathogenesis of coronavirus  
476 disease (COVID-19) outbreak. *Journal of Autoimmunity*. 2020;109:102433.

477 3. Machado C, Gutierrez JV. ANOSMIA AND AGEUSIA AS INITIAL OR UNIQUE  
478 SYMPTOMS AFTER SARS- CoV-2 VIRUS INFECTION ( Review article ). 2020;2 April.

479 doi:10.20944/preprints202004.0272.v1.

480 4. Levinson R, Elbaz M, Ben-Ami R, Shasha D, Levinson T, Choshen G, et al. Title:

481 Anosmia and dysgeusia in patients with mild SARS-CoV-2 infection. Cold Spring

482 Harbor Laboratory Press; 2020. doi:10.1101/2020.04.11.20055483.

483 5. Moein ST, Hashemian SMR, Mansourafshar B, Khorram-Tousi A, Tabarsi P, Doty RL.

484 Smell dysfunction: a biomarker for COVID-19. *Int Forum Allergy Rhinol*.

485 2020;:alr.22587. doi:10.1002/alr.22587.

486 6. Gilani S, Roditi R, Naraghi M. COVID-19 and anosmia in Tehran, Iran. *Med*

487 *Hypotheses*. 2020;141:109757.

488 7. Parma V, Ohla K, Veldhuizen MG, Niv MY, Kelly CE, Bakke AJ, et al. More than

489 smell – COVID-19 is associated with severe impairment of smell, taste, and

490 chemesthesis. *Chemical Senses* | Oxford Academic. 2020.

- 491 <https://academic.oup.com/chemse/advance->  
492 [article/doi/10.1093/chemse/bjaa041/5860460](https://doi.org/10.1093/chemse/bjaa041/5860460). Accessed 22 Jun 2020.
- 493 8. Whitcroft KL, Hummel T. Olfactory Dysfunction in COVID-19: Diagnosis and  
494 Management. *JAMA - Journal of the American Medical Association*. 2020.
- 495 9. Soler ZM, Patel ZM, Turner JH, Holbrook EH. A primer on viral-associated olfactory  
496 loss in the era of COVID-19. *International Forum of Allergy and Rhinology*. 2020.
- 497 10. BAY E. Smell and taste disorders. *Med Welt*. 1961;42:2143–7.
- 498 11. Bagheri SHR, Asghari AM, Farhadi M, Shamshiri AR, Kabir A, Kamrava SK, et al.  
499 Coincidence of COVID-19 epidemic and olfactory dysfunction outbreak. *medRxiv*.  
500 2020;:2020.03.23.20041889.
- 501 12. Lechien JR, Chiesa-Estomba CM, De Siati DR, Horoi M, Le Bon SD, Rodriguez A, et  
502 al. Olfactory and gustatory dysfunctions as a clinical presentation of mild-to-  
503 moderate forms of the coronavirus disease (COVID-19): a multicenter European  
504 study. *Eur Arch Oto-Rhino-Laryngology*. 2020.
- 505 13. Mao L, Jin H, Wang M, et al. Neurologic Manifestations of Hospitalized Patients  
506 With Coronavirus Disease 2019 in Wuhan, China [published online ahead of print,  
507 2020 Apr 10]. *JAMA Neurol*. 2020;77(6):1-9. doi:10.1001/jamaneurol.2020.1127
- 508 14. Menni C, Valdes AM, Freidin MB, et al. Real-time tracking of self-reported  
509 symptoms to predict potential COVID-19. *Nat Med*. 2020;26(7):1037-1040.  
510 doi:10.1038/s41591-020-0916-215. Yan CH, Faraji F, Prajapati DP, Boone CE, DeConde  
511 AS. Association of chemosensory dysfunction and COVID-19 in patients presenting  
512 with influenza-like symptoms. *Int Forum Allergy Rhinol*. 2020;10(7):806-813.  
513 doi:10.1002/alr.22579
- 514 16. Tong JY, Wong A, Zhu D, Fastenberg JH, Tham T. The Prevalence of Olfactory and



- 515 Gustatory Dysfunction in COVID-19 Patients: A Systematic Review and Meta-analysis.  
516 Otolaryngol Neck Surg. 2020;:019459982092647. doi:10.1177/0194599820926473.
- 517 17. Menni C, Sudre CH, Steves CJ, Ourselin S, Spector TD. Quantifying additional  
518 COVID-19 symptoms will save lives. Lancet (London, England). 2020;0.  
519 doi:10.1016/S0140-6736(20)31281-2.
- 520 18. Gerkin RC, Ohla K, Veldhuizen MG, Joseph P V., Kelly CE, Bakke AJ, et al. Recent  
521 smell loss is the best predictor of COVID-19: a preregistered, cross-sectional study.  
522 medRxiv. 2020.
- 523 19. Chaudhari N, Roper SD. The cell biology of taste. Journal of Cell Biology. 2010.
- 524 20. Robin X, Turck N, Hainard A, Tiberti N, Lisacek F, Sanchez JC, et al. pROC: An  
525 open-source package for R and S+ to analyze and compare ROC curves. BMC  
526 Bioinformatics. 2011;12:77. doi:10.1186/1471-2105-12-77.
- 527 21. Menni C, Valdes A, Freydin MB, Ganesh S, Moustafa JE-S, Visconti A, et al. Loss of  
528 smell and taste in combination with other symptoms is a strong predictor of COVID-  
529 19 infection. medRxiv. 2020;:2020.04.05.20048421.
- 530 22. Symptoms of Coronavirus | CDC. [https://www.cdc.gov/coronavirus/2019-](https://www.cdc.gov/coronavirus/2019-ncov/symptoms-testing/symptoms.html)  
531 [ncov/symptoms-testing/symptoms.html](https://www.cdc.gov/coronavirus/2019-ncov/symptoms-testing/symptoms.html). Accessed 24 Jul 2020.
- 532 23. Salmon D, Bartier S, Hautefort C, Nguyen Y, Nevoux J, Hamel A-L, et al. Self-  
533 reported loss of smell without nasal obstruction to identify COVID-19. The  
534 multicenter CORANOSMIA cohort study. J Infect. 2020.  
535 doi:10.1016/j.jinf.2020.07.005.
- 536 24. Brann DH, Tsukahara T, Weinreb C, Lipovsek M, Van den Berge K, Gong B, et al.  
537 Non-neuronal expression of SARS-CoV-2 entry genes in the olfactory system suggests  
538 mechanisms underlying COVID-19-associated anosmia. Sci Adv. 2020;:eabc5801.

- 539 doi:10.1126/sciadv.abc5801.
- 540 25. Cooper KW, Brann DH, Farruggia MC, Bhutani S, Pellegrino R, Tsukahara T, et al.  
541 COVID-19 and the chemical senses: supporting players take center stage. *Neuron*.  
542 2020;0. doi:10.1016/j.neuron.2020.06.032.
- 543 26. Roper SD, Chaudhari N. Taste buds: Cells, signals and synapses. *Nature Reviews*  
544 *Neuroscience*. 2017;18:485–97. doi:10.1038/nrn.2017.68.
- 545 27. Hummel T, Landis BN, Hüttenbrink K-B. Smell and taste disorders.  
546 [www.awmf.org/leitlinien/detail/II/017-050.html](http://www.awmf.org/leitlinien/detail/II/017-050.html). Accessed 19 Jul 2020.
- 547 28. Roland LT, Gurrola JG, Loftus PA, Cheung SW, Chang JL. Smell and taste  
548 symptom-based predictive model for COVID-19 diagnosis. *Int Forum Allergy Rhinol*.  
549 2020;10:832–8. doi:10.1002/alr.22602.
- 550 29. Agyeman AA, Chin LL, Landersdorfer KB, Liew CB, Ofori-Asenso D. Smell and  
551 Taste Dysfunction in Patients With COVID-19: A Systematic Review and Meta-  
552 analysis. *Mayo Clin Proc*. 2020. doi:10.1016/j.mayocp.2020.05.030.
- 553 30. Sethuraman N, Jeremiah SS, Ryo A. Interpreting Diagnostic Tests for SARS-CoV-2.  
554 *JAMA - Journal of the American Medical Association*. 2020;323:2249–51.
- 555 31. Wang W, Xu Y, Gao R, Lu R, Han K, Wu G, et al. Detection of SARS-CoV-2 in  
556 Different Types of Clinical Specimens. *JAMA - Journal of the American Medical*  
557 *Association*. 2020;323:1843–4.
- 558
